1 **Transcriptional analysis of *Colletotrichum fructicola* from Different**  
2 **Geographic regions inoculated to *Camellia oleifera***

3 Shimeng Tan<sup>1,2,3,4</sup>, Yanying Chen<sup>1,2,3,5</sup>, Guoying Zhou<sup>1,2,3,4</sup>, Junang Liu<sup>1,2,3,5\*</sup>

4 <sup>1</sup> Key Laboratory of National Forestry and Grassland Administration on Control of Artificial Forest Diseases and  
5 Pests in South China, Central South University of Forestry and Technology, Changsha 410004, China;

6 <sup>2</sup> Hunan Provincial Key Laboratory for Control of Forest Diseases and Pests, Central South University of Forestry  
7 and Technology, Changsha 410004, China;

8 <sup>3</sup> Key Laboratory for Non-wood Forest Cultivation and Conservation of Ministry of Education, Central South  
9 University of Forestry and Technology, Changsha 410004, China;

10 <sup>4</sup> College of Biological Science and Technology, Central South University of Forestry and Technology, Changsha  
11 410004, China;

12 <sup>5</sup> College of Forestry, Central South University of Forestry and Technology, Changsha 410004, China.

13

14 \* Corresponding author: Junang Liu, [kjc9620@163.com](mailto:kjc9620@163.com).

15

## 16 **Abstract**

### 17 Aim

18 The study hopes to investigate differences in molecular processes and regulatory genes at different stages of  
19 infection of *Colletotrichum fructicola*, the dominant pathogen of oil tea (*Camellia oleifera*) anthracnose in China.

### 20 Methods

21 The study compared the pathogenicity of *C. fructicola* from different populations (Wuzhishan, Hainan province  
22 and Shaoyang, Hunan province), and gene expression of representative strains of the two populations before and  
23 after infection with *Camellia oleifera* using RNA sequencing.

### 24 Results

25 We found that *C. fructicola* from Wuzhishan has a stronger ability to infect and impact *oil tea* leaf tissue. Up-  
26 regulated genes in the two geographic populations following infected to oil tea were associated with a number of  
27 ribosome-related GO and KEGG pathways, and were significantly enriched in galactosidase activity, glutamine  
28 family amino acid metabolism, arginine and proline metabolism. Up-regulated gene lists associated with infection  
29 by the Wuzhishan strains were significantly enriched in ribosome-related metabolic pathways as well as purine  
30 metabolism pathways, while Shaoyang strains were not significantly enriched in these processes.

### 31 Conclusions

32 These results indicate that *C. fructicola* obtained sugars and amino acids from *oil tea* tissue to resist host immune  
33 pressure. Moreover, the greater regulation of purine metabolism pathway in the Wuzhishan strain inoculated to  
34 *oil tea* might contribute to its stronger pathogenicity.

35 **Key words:** Anthracnose of *Camellia oleifera*, *Colletotrichum fructicola*, Transcriptome, Differential expression

## 36 **Introduction**

37 Oil tea (*Camellia oleifera*) is an agronomically and culturally important edible woody oil tree species found in  
38 China. Oil extracted from the seeds of *oil tea* is comparable to olive (*Olea europaea*) oil. *Oil tea* is widely  
39 distributed between the northern latitudes of 32°57' and 11°17' in China (Cui et al. 2016). Suitable climates for  
40 growth of *oil tea* are generally mild, receive sufficient sunshine and rain, and have short or no ice periods, therefore  
41 occurrence of disease and damage due to insect pests are frequent (Zhou et al. 2017). Anthracnose is a prevalent  
42 disease which affects *oil tea*, is caused by *Colletotrichum fructicola*, and is readily dispersed via spores. Spores  
43 of anthracnose can survive winter conditions and result in continuous infections year over year (Ye and He 2011).

44 Anthracnose can cause leaf fall, flower fall and fruit damage, which can impact yield or oil quality, leading to  
45 economic loss.

46 *Colletotrichum* fungus is a globally distributed and important pathogen. *Colletotrichum* fungus is a semi-live  
47 plant fungus, and can affect almost all crops and economic plants. The conidia *colletotrichum* fungus are spread  
48 by wind, rain, insects and other media. Conidia germinate in aqueous environments to form appressorium and  
49 produce infection nails which can puncture epidermal tissues such as plant leaves and peels. After invading the  
50 host, mycelia of *colletotrichum* fungi are quickly formed between plant cells, destroy plant tissues and use their  
51 nutrients for further replication (Chen et al. 2009; Wang et al. 2004). To date, 8 species of anthracnose pathogens  
52 of *oil tea* have been classified based on morphological and polygenic molecular identification (Jiang and Li 2018;  
53 Li et al. 2017; Tang et al. 2015). Of identified *oil tea*, *C. fructicola* has the highest isolation rate in diseased leaf  
54 samples in China, and is the dominant pathogen of *Camellia* anthracnose (Li et al. 2016). Recent research on the  
55 prevention and treatment of anthracnose in oil tea has focused on application of new chemicals or biological  
56 controls such as bacteria (Deng et al. 2017; Zhou 2015). However, it has been suggested that to prevent occurrence  
57 of anthracnose in oil tea, it is necessary to have a deeper understanding of its pathogenic mechanisms to develop  
58 specific control measures. Therefore, in the current study we focused on the pathogenesis of *C. fructicola* on oil  
59 tea leaves, with the aim of improving our understanding of the molecular mechanisms of pathogenesis of *C.*  
60 *fructicola* infection of oil tea.

61 When a pathogen colonizes and infects a plant, defense responses aim to nutritional starve the fungi and  
62 subject it to reactive oxygen species (ROS) stress (Deng and Naqvi 2019). Initiation and control of plant defense  
63 responses rely on flexible and rapid molecular regulation of numerous pathways in responses to incursion by a  
64 pathogen. The infection of plants by semi-living vegetative fungi is a continuous and staged process whereby  
65 infection of plants by *Colletotrichum* fungi can be divided into two stages: vegetative and death phase. Hyphae  
66 growth of fungi and its spread is dependent on nutritional availability (Curry et al. 2002). Transcriptome  
67 sequencing as emerged as a useful tool for investigating the molecular regulation of different stages of infection  
68 by *C. fructicola*.

69 To investigate molecular mechanisms of pathogenicity of *C. fructicola* from different geographical  
70 populations, we analyzed fungi isolated from oil tea samples produced in Shaoyang, Hunan province and  
71 Wuzhishan, Hainan province, China via RNA sequencing.

## 72 **Materials and methods**

73 *C. fructicola* used for experiments was isolated from diseased oil tea leaves collected from Shaoyang, Hunan and  
74 Wuzhishan, Hainan, which were stored at -80 °C. Four strains of *C. fructicola* for test were from Shaoyang, Hunan,  
75 and 7 strains of *C. fructicola* for test were from Wuzhishan, Hainan. The geographical and climatic characteristics  
76 of the two locations are shown in Table 1 (Ma 2010; Su 2018; Zheng et al. 2016).

### 77 ***Media preparation***

78 Potato dextrose agar medium (PDA medium) consisted of; 200g peeled potatoes (from local market in Changsha  
79 city, China) was added to 1000mL water and heated for 20 minutes. The mixture was filtered through gauze, and  
80 20g glucose and 20g agar were added to the filtrate. The mixture was autoclaved at 121 °C for 20 minutes. The  
81 potato dextrose broth medium (PDB medium) can be added without agar. One gram of yeast extract was added to  
82 1L of PDA or PDB medium to promote production of conidia.

### 83 ***Inoculation experiment on leaves of oil tea***

84 The pathogenicity of the tested strains was determined *in vitro* by the injury inoculation test using leaves of the  
85 *Oil tea*, Huashuo. Young leaves were collected, petioles were sealed with paraffin wax, and then placed into a  
86 glass petri dish with wet cotton pads added to maintain humidity. A sterilized needle was used to make six pinholes  
87 along each leaf surface, three on left half and three on right half of each leaf. There would be eight leaves replicates  
88 and 48 pinholes in total. Leaves were inoculated with mycelium from Shaoyang and Wuzhishan strains, the left  
89 half with Shaoyang and right half of the leaf with Wuzhishan, each pinhole was inoculated with a 6mm diameter  
90 mycelium piece, for 24 inoculation samples per strain total.

91 Petri dishes were sealed with parafilm and cultured in the dark at 28 °C for 96 hours. Leaves were then  
92 removed and the diameter of the diseased spots was measured and photographed.

### 93 ***Sampling of RNA***

94 Two representative strains were cultured on a PDA solid medium for 96 hours. Hyphae pieces at the edge of  
95 several colonies were cut and transferred to 100 mL of prepared PDB medium, and cultured on a shaker at 160  
96 rpm and 28 °C for 48 hours. The culture solution was filtered through three layers of microscope wipe paper into  
97 new centrifuge tubes and then centrifuged at 5000 rpm for 3 minutes. The supernatant was poured off, spores were  
98 rinsed twice with sterile water and sterile water was added to reconstitute spores at a concentration of  $1 \times 10^9$  pcs  
99 / mL. Next, 1.5mL of spore solution was placed into a 1.5mL centrifuge tube and centrifuged at 12000rpm for 2

100 min. The supernatant was removed to obtain conidia samples which were immediately frozen with liquid nitrogen  
101 and stored in a -80 °C refrigerator.

102 Sterile water was added to the remaining spore fluid for dilution, and the number of spores was counted to  
103 adjust the concentration of spore fluid to  $1 \times 10^6$  pcs / mL. Petioles were sealed with wax and placed in a petri  
104 dish with wet absorbent cotton. The spore fluid was evenly sprayed onto the leaves, and then the petri dish was  
105 sealed. Leaves were incubated at 28 °C in the dark for 96 hours. After incubation, leaves were cut and placed into  
106 collection tubes, then immediately frozen with liquid nitrogen and transferred to a -80 °C refrigerator. There were  
107 3 biological replicates per sample.

### 108 ***RNA sequencing and data analysis***

109 The spores and lesion samples were sent to Genedenovo Biotechnology Co., Ltd, Guangzhou, China. for RNA  
110 extraction and RNA sequencing. Among them, spore sample group number is identified as S (Start), and lesion  
111 sample group number is L (Later). Data analysis was performed online using the Omicsmart platform  
112 (Genedenovo Biotechnology Co., Ltd, Guangzhou, China; [https:// www.omicsmart. com/](https://www.omicsmart.com/)).

### 113 ***Real-time PCR***

114 The kits: FastQuant RT Kit with gDNase (TIANGEN Biotech Co., Ltd, Beijing, China); SuperReal PreMix Plus  
115 (SYBR Green) (TIANGEN Biotech Co., Ltd, Beijing, China) were used for analysis of samples.

116 Samples of RNA subjected to RNA-seq analysis used the FastQuant RT Kit with gDNase (TIANGEN) for  
117 first-strand cDNA synthesis. Five sequences were randomly selected from the differentially expressed gene data  
118 obtained by RNA sequencing, and quantitative PCR primers were designed using NCBI primer-blast. Primer  
119 information is shown in Table 2. Primer synthesis was completed by Beijing Qingke Biotechnology Co., Ltd. The  
120 Actin gene, which was stably expressed in all RNA-seq samples and was highly expressed, was selected as the  
121 reference gene (Li 2018). The real-time PCR test uses SuperReal PreMix Plus (SYBR Green). The reaction system  
122 consisted of 20  $\mu$ L, including 1  $\mu$ g of cDNA template (100ng /  $\mu$ L), and 0.75  $\mu$ L for each of the front and back  
123 primers. Data analysis was performed using QuantStudio <sup>TM</sup> Design & Analysis Software (version 1.5.1, Thermo  
124 Fisher Scientific). For qRT-PCR data, relative expression  $\log_2$ FC was calculated using the  $\Delta\Delta$ Ct method, and  
125 compared with RNA sequencing data. Each sample had three replicates.

### 126 ***Statistical analysis***

127 The diameters of *C. fructicola* strains from Shaoyang population and Wuzhishan population were counted after  
128 96 hours of cultivation, and the average diameter of the *C. fructicola* from two populations was calculated using  
129 IBM SPSS Statistics 20 (IBM, U.S.A). The diameter of *C. fructicola* from two populations were compared by  
130 independent sample t-test and two-sided test ( $\alpha = 0.05$ ).

## 131 **Results**

### 132 ***Comparison of Mycelia Pathogenicity of Two Populations***

133 Diameter of lesions following inoculation was counted and results are shown in Figure 1. Average diameter of  
134 lesions following incubation with the Shaoyang population was 0.37 cm, and for the Wuzhishan population was  
135 0.56 cm. An independent sample T test was performed on lesion diameter among the two populations, and  
136 differences were significant ( $P=0.046 < 0.05$ ).

### 137 ***Comparison of pathogenicity within populations and selection of representative strains***

138 In order to select a representative strain from each of the two populations for transcriptome analysis, a comparative  
139 test of pathogenicity among the strains in the two populations was performed.

140 Results of the pathogenicity test of Wuzhishan populations are shown in Figure 2A. After 96 hours of  
141 inoculation, average diameter of lesions caused by 7 strains of Wuzhishan-origin was 0.50 cm (The dotted line in  
142 figure 2A). Among the seven strains tested, WZS0202b was the weakest pathogen, whereas WZS0402a and  
143 WZS0203b had the highest pathogenicity.

144 Results of the pathogenicity test of Shaoyang populations are shown in Figure 2B. After 96 hours of  
145 inoculation average diameter of lesions was 0.45cm (The dotted line in figure 2B). The pathogenicity of the strain  
146 SY0104b was the highest, while pathogenicity of SY0201a was the weakest.

147 Based on results of the two strains of *C. fructicola*, WZS0402a and SY0104b were selected for RNA  
148 sequencing.

### 149 ***Real-time PCR***

150 To verify reliability of sequencing data, five differentially expressed genes were randomly selected for real-time  
151 PCR. The gene Actin was selected as the reference gene. Quantitative PCR results showed that only the gene  
152 CGGC5\_435 in SY-S-vs-SY-L was significantly differentially expressed when compared to the transcriptome data.

153 All other results of gene quantification were consistent with changes observed in the transcriptome sequencing  
154 results (Figure 3). In addition, relative expression levels ( $\log_2FC$  value) were not significantly different from those  
155 of the RNA sequencing results, indicating that transcriptomic sequencing results are reliable.

#### 156 ***Statistics of differentially expressed genes***

157 Differentially expressed genes were screened using  $FDR(\text{False Discovery Rate}) \leq 0.05$  and  $|\log_2FC| \geq 1$  as  
158 thresholds, and then genes were manually eliminated if they had low expression levels ( $FPKM < 0.5$ ), resulting in  
159 selection of WZS-S-vs-WZS-L, SY-S-vs-SY-L. Using homologous spore samples as a control, the number of  
160 genes up- and down-regulated in the infection groups were tabulated (Figure 4A). In the WZS-S-vs-WZS-L group,  
161 a total of 7846 differential genes were screened, 5951 of which expression was up-regulated (75.85%), and 1895  
162 (24.15%) down-regulated. In the SY-S-vs-SY-L group screening, a total of 7682 differential genes were identified,  
163 5280 (68.73%) of which were up-regulated, and 2402 (31.27%) were down-regulated. During the interaction stage  
164 of oil tea infected with *C. fructicola*, the number of up-regulated genes was significantly higher than that of down-  
165 regulated genes in the two representative strains. The number of up-regulated genes of *C. fructicola* from  
166 Wuzhishan after infection was higher than that from the Shaoyang strains. Comparison of differentially expressed  
167 gene lists post-inoculation demonstrated that 4089 genes were up-regulated in both strains after 96 hours of  
168 infection (Figure 4B). Overall, similarly expressed genes accounted for 68.7% (WZS) and 77.4% (SY) of up-  
169 regulated genes, respectively.

#### 170 ***Gene Ontology enrichment analysis***

171 Gene ontology (GO) function enrichment analysis was performed on differentially expressed genes following  
172 infection of WZS-S-vs-WZS-L and SY-S-vs-SY-L groups. As shown in Table 3, GO terms were screened with  
173  $P\text{value} \leq 0.01$  as the threshold. It was found that inoculation with the representative strain of Wuzhishan resulted  
174 in enrichment of preribosome, large ribosomal subunit and organelle ribosome GO terms. Identified molecular  
175 functions were mainly related to structural molecular activity, translation factor activity (RNA binding), and  
176 galactosidase activity. Biological processes were mainly related to the glutamine family amino acid metabolism  
177 process.

178 Screening of GO enrichment results of the Shaoyang group, demonstrated that enriched cell composition  
179 terms were related to ribosome precursors, large ribosome subunits, and organelle ribosomes. Molecular functions  
180 were mainly related to structural molecular activity and galactosidase activity. Identified biological processes were

181 mainly related to amino acid metabolic processes and glycoprotein metabolic processes of the glutamine family.

182 As presented in Table 3, it can be seen that cell composition terms for the two groups were significantly  
183 enriched in ribosomal-related annotations, but the number of differentially expressed genes in the corresponding  
184 GO annotations in the Shaoyang group was significantly lesser than that in the Wuzhishan group. Enriched  
185 molecular functions among the two groups were related to structural molecular activity and galactosidase activity,  
186 however RNA-bound translation factor activity that was enriched in the Wuzhishan group was not significantly  
187 enriched in the Shaoyang group. Enriched GO biological processes in both groups were related to glutamine amide  
188 family amino acid metabolism. However, glycoprotein metabolism was enriched in the Shaoyang group and not  
189 in the Wuzhishan group. Of the two co-enriched annotations, genes associated with galactosidase activity and  
190 amino acid metabolism of the glutamine family were most similar.

### 191 ***KEGG pathway enrichment analysis***

192 Analysis of gene lists identified 7 KEGG pathways (Q value  $\leq 0.01$ ) following inoculation with the Wuzhishan  
193 and Shaoyang populations (Table 4). Of identified GO pathways, ribosome (ko03010), arginine and proline  
194 metabolism (ko00330) were significantly enriched in both groups, indicating that arginine and proline metabolism  
195 play an important role in processes of infection of *C. fructicola*. KEGG pathways significantly enriched only in  
196 the Wuzhishan population included ribosome biogenesis in eukaryotes (ko03008), spliceosome (ko03040), RNA  
197 transport (ko03013), RNA polymerase (ko03020), and purine metabolism (ko00230). Pathways that were  
198 significantly enriched only in the Shaoyang group included phenylalanine metabolism and beta-alanine  
199 metabolism.

200 Comparison of differential genes associated with the purine metabolism pathway revealed that 35 differential  
201 genes were up-regulated in the Wuzhishan group and Shaoyang group, while the remaining 27 up-regulated genes  
202 in the Wuzhishan group were not up-regulated in the Shaoyang group. Figure 5 shown the heatmap of the 27 up-  
203 regulated genes specific to the WZS group. Of up-regulated genes specific to the purine metabolism pathway  
204 following inoculation with the Wuzhishan population, 12 of the 27 genes are involved in the regulation of purine  
205 biosynthesis and catabolic metabolism (Table 5). Related downstream products of this pathway include guanylate  
206 synthase, adenylate deaminase, inosine cyclic hydrolase, and adenine phosphoribosyltransferase. The remaining  
207 17 genes of the Wuzhishan population an up-regulated gene list is involved in RNA and DNA synthesis. Purine  
208 biosynthesis includes de novo synthesis and remedy pathway (Figure 6).



## 209 Discussion

### 210 *C. fructicola* collected in Wuzhishan have a stronger ability to infect Oil tea leaf tissue.

211 The two regions selected for comparison of *C. fructicola* populations are approximately 7 ° in latitude apart.  
212 Average annual rainfall of Wuzhishan is higher than that of Shaoyang, as is temperature. However, Shaoyang  
213 experiences greater temperature variation, with winter temperatures which are not suitable for proliferation of *C.*  
214 *fructicola*. Therefore, we speculate that the anthracnose pathogen's wintering time in Wuzhishan is shorter, and  
215 that time of onset is earlier. Therefore, due to the presences of conditions which promote growth of anthracnose,  
216 we speculate that annual incidence of anthracnose in *Oil tea* in Wuzhishan is greater and occurs over longer  
217 durations of time.

218 A comparison of biological characteristics and pathogenicity of the two geographical populations of *C.*  
219 *fructicola* found that the number of lesions after 96 hours of inoculation did not differ statistically. However, there  
220 was a significant difference in the diameter of the lesions among the two populations of *C. fructicola* after  
221 inoculation with *Oil tea* for 96 hours. The spread of lesions on *Oil tea* caused by the Wuzhishan population was  
222 more serious, indicating that *C. fructicola* from Wuzhishan had a stronger ability to destroy *Oil tea* leaf tissue.

223 Based on results of the phenotypic experiments, the two populations of *C. fructicola* had similar abilities to  
224 infect the host however their ability to further propagate differed.

### 225 *Changes in C. fructicola carbon source utilization on Oil tea leaf tissues in the late infection stage*

226 RNA sequencing results demonstrated gene, GO term and KEGG pathway enrichment of pathways related to  
227 ribosomal activity for both populations. Enriched GO cell composition terms included organelle ribosomes in both  
228 populations, this result indicates that mitochondria and endoplasmic reticulum ribosomes might play important  
229 roles in propagation of infection and illustrates the active regulation of various proteins by pathogenic fungi after  
230 infection. Proteins like hexose transporters can be used to absorb nutrients from host cell tissues or to resist  
231 defensive immune stress in plants.

232 After infection by pathogenic fungi, carbohydrates in the apoplast are important carbon sources of pathogenic  
233 fungi. Previous work has found that four hexose transporters (CgHxt1, CgHxt2, CgHxt3, and CgHxt5) of  
234 *Colletotrichum graminicola* can transport a variety of hexoses, including fructose, mannose, galactose and xylose.  
235 The transporters *CgHxt2* and *CgHxt5* are only expressed in the vegetative phase based on dead plant tissue  
236 (Lingner et al. 2011). Another study showed that *MFS1* gene knockouts of *Colletotrichum lindemuthianum* had

237 defects in the use of glucose, mannose and fructose. Furthermore, semi-quantitative PCR analysis found that the  
238 *MFS1* gene was only up-regulated during the vegetative phase based on dead plant tissue 96 hours after infecting  
239 the host (Pereira et al. 2013). In the current study, GO functional enrichment analysis suggests that *C. fructicola*  
240 transforms and utilizes sugar derived from plants. Galactosidase is a class of enzymes that hydrolyze galactosyl  
241 bond-containing substances, and hydrolysis produces substances such as galactose, glucose and fructose (Yan et  
242 al. 2017). Although few enzymes related studies related to molecular mechanisms of phytopathogenic fungi exist,  
243 we suggest that galactosides were hydrolyzed by *C. fructicola* 96 hours after infection with oil tea as a new carbon  
244 source.

#### 245 ***Glutamine family amino acids help C. fructicola resist host immune responses during late stages of infection***

246 Glutamine family amino acids include arginine, proline, glutamic acid, and glutamine, where arginine is a  
247 precursor of proline and glutamic acid. A number of studies have demonstrated that synthesis of arginine by fungi  
248 has important effects on growth and development, production of conidia, *MoARG1*, *MoARG5*, *6* and *MoARG7* by  
249 *Magnaporthe oryzae* (Zhang et al. 2015), *ARG1* by *Fusarium oxysporum* (Namiki et al. 2001), *PATH-19* and  
250 *PATH-35* by *Colletotrichum higginsianum* (Takahara et al. 2012). The anti-stress effects of proline in plants and  
251 endophytic fungi has been widely studied. A number of plants can accumulate large amounts of proline when  
252 exposed to stresses such as reactive oxygen stress, therefore proline is often used as a physiological or biochemical  
253 indicators of plant stress resistance (Zhu et al. 2009). However, the role of proline in pathogenic fungi has not  
254 received much attention. For example, proline has been reported to remove reactive oxygen species in  
255 *Colletotrichum truncatum* (Chen C, et al, 2005).

256 Glutamine and glutamic acid can be interconverted by enzymes: In *Saccharomyces cerevisiae*, glutamine can  
257 be directly converted to glutamate by glutamine enzymes. In addition, glutamine can be degraded or converted to  
258 glutamate by NADH-dependent glutamate synthase (Miller and Magasanik 1990). In addition, glutamine and  
259 glutamic acid are involved in biosynthesis of glutathione. Glutathione exists in two forms: an oxidized state  
260 (GSSG) or reduced state (GSH). During conversion of GSH to GSSG, its thiol group is used as an electron donor  
261 to maintain the activity of thiol proteins and enzymes, and to reduce host-derived ROS stress on pathogen cells.  
262 Furthermore, the glutathione antioxidant system is important to pathogens to facilitate infection of hosts, therefore  
263 glutamine family amino acids play an important role in resisting plant immune responses.

#### 264 ***Up-regulation of purine metabolism improves growth of C. fructicola***

265 By use of GO analysis, it was observed that ribosome-related genes of Wuzhishan and Shaoyang fungi populations  
266 were significantly up-regulated following infection. However, the number of differentially expressed genes  
267 associated with ribosome-related annotations in the Shaoyang group was significantly less than that in the  
268 Wuzhishan group. In addition, comparison of GO analysis results of differentially expressed gene lists  
269 demonstrated enrichment in activity of translation factors for the Wuzhishan group but not the Shaoyang group,  
270 indicating that the translation factor activity of the Wuzhishan group was significantly higher during the process  
271 of ribosomal translation. KEGG enrichment analysis indicated that the Wuzhishan group was significantly  
272 enriched in signal pathways such as spliceosome, RNA transport, and RNA polymerase, while they were not  
273 significantly enriched in the Shaoyang group. Differences in transcriptional and translational activity of the two  
274 populations of *C. fructicola* indicate that the Wuzhishan population are most active, and that enriched pathways  
275 and differentially expressed genes might be related to its stronger pathogenicity.

276 Purine nucleotide metabolism is necessary for biological metabolic processes and expression of genetic  
277 information, and supports a number of physiological and biochemical reactions (Zrenner et al. 2006). Purine in  
278 living organisms can be divided into adenine, guanine, xanthine and hypoxanthine according to their base pairs.  
279 Purines are not only an important part of nucleic acid, but also participate in protein translation, phosphate  
280 utilization and energy metabolism (Gauthier et al. 2008). Using KEGG enrichment analysis, we found that  
281 differentially expressed genes in the Wuzhishan group were significantly enriched in processes related to purine  
282 metabolism, indicating that *C. fructicola* in Wuzhishan group induce purine related genes associated with the  
283 nucleotide metabolic pathway after infection. We found that 33 differentially expressed genes in the Wuzhishan  
284 group and Shaoyang group were up-regulated following infection, while the remaining 29 of the 62 up-regulated  
285 genes were specific to the Wuzhishan group. There were no significant differences in expression levels before and  
286 after infection. Twelve of the 29 genes that were specific to the Wuzhishan group were involved in regulation of  
287 purine biosynthesis and catabolic metabolism (Table 5), especially biosynthetic pathways. Of the 12 genes, four  
288 (*PRSS5*, *ADE3*, *ADE17*, *ADE6*) are involved in regulating biosynthesis of IMP in the purine de novo synthesis  
289 pathway, three (*ADSS*, *ADK*, *GUAI*) are involved in regulating ATP and GTP synthesis by IMP, one (*APT1*)  
290 participates in regulation of purine rescue pathways, and four (*AAHI*, *ADAI*, *UAZ*, *NT5E*) participate in regulation  
291 of purine degradation pathways.

292 Genes that were specifically up-regulated in the Wuzhishan group play important roles in purine anabolic  
293 metabolism, and data show that the purine de novo synthesis pathway is directly related to the growth and  
294 development and pathogenicity of pathogenic fungi. Previously, it has been observed that the guanylate kinase

295 and inosine-5'-phosphate lactate dehydrogenase (IMPDH) play key roles in the GTP synthesis pathway. Knock  
296 down of the Guanylate kinase gene, *MoGuk2*, in *Magnaporthe oryzae* led to reductions in the expansion of hyphae  
297 by the host (Cai et al. 2017). The five active sites of the IMPDH coding gene, *MoIMD4*, are involved in regulating  
298 the pathogenicity of *M. oryzae*, thus *MoIMD4* knockout mutant are more susceptible to infection than wild-type  
299 rice (Yang et al. 2019). *ACD1* of *Fusarium graminearum* participates in the regulation of the conversion process  
300 of AMP to IMP. The knockout mutant of *ACD1* cannot form ascospores, and the expansion ability of the infection  
301 hyphae decreases in the host cells. Further analyses of phenotypes were performed in the knockout mutant of the  
302 *APT1*, *XPT1*, *AAH1*, and *GUD1* genes, revealed that the growth rate and pathogenicity of these four mutants were  
303 not significantly different from those of the wild type, which indicated when a de novo purine synthesis pathway  
304 exist in *F. graminearum*, the *APT1*, *XPT1*, *AAH1*, and *GUD1* genes involved in regulating the purine salvage  
305 pathway are not necessary for the growth and pathogenicity of *F. graminearum*. (Sun 2019). Our analysis indicates  
306 that representative strains of Wuzhishan *C. fructicola* have greater on purine metabolism, which might be related  
307 to its greater pathogenicity.

## 308 **Acknowledgement**

309 We thank the sub-project (Ecological Adaptability and Molecular Basis of the Spread of *Camellia oleifera*  
310 Anthracnose) of the National Key R & D Project (2017YFD0600103-3) and Graduate Research Project of Central  
311 South University of Forestry and Technology (No. 20181010) for financial support.

## 312 **References**

- 313 Cai X, Zhang X, Li X, Liu M, Liu X, Wang X, Zhang H, Zheng X, Zhang Z (2017) The Atypical Guanylate Kinase  
314 *MoGuk2* Plays Important Roles in Asexual/Sexual Development, Conidial Septation, and Pathogenicity in  
315 the Rice Blast Fungus. *Front Microbiol* 8(2467-2467 doi:10.3389/fmicb.2017.02467
- 316 Chen C, Xia R, Chen H, He Y (2018) TBtools, a Toolkit for Biologists integrating various biological data handling  
317 tools with a user-friendly interface. *BioRxiv*:289660
- 318 Chen, C., & Dickman, M. B. (2005). Proline suppresses apoptosis in the fungal pathogen *Colletotrichum trifolii*.  
319 *Proceedings of the National Academy of Sciences of the United States of America*, 102(9), pp. 3459-3464.  
320 doi:10.1073/pnas.0407960102
- 321 Chen X-M, Wang J, Sun S, Wu H-X (2009) Histopathological observation on the invasion of *Colletotrichum*  
322 *gloeosporioides* to oil tea. *Forest Pest and Disease* 28(5):6-9

- 323 Cui X, Wang W, Yang X, Li S, Qin S, Rong J (2016) Potential distribution of wild *Camellia oleifera* based on  
324 ecological niche modeling. *Biodiversity Science* 24(10):1117-1128 doi:10.17520/biods.2016164
- 325 Curry KJ, Abril M, Avant JB, Smith BJ (2002) Strawberry Anthracnose: Histopathology of *Colletotrichum*  
326 *acutatum* and *C. fragariae*. *Phytopathology*® 92(10):1055-1063 doi:10.1094/phyto.2002.92.10.1055
- 327 Deng L, Liu J, Zhou G (2017) Antifungal activity of broth of *Camellia* anthracnose of antagonistic actinomycete  
328 CF17 and isolation and purification of its antifungal substances. *Journal of Fujian Agriculture and Forestry*  
329 *University (Natural Science Edition)* 46(1):15-20
- 330 Deng YZ, Naqvi NI (2019) Metabolic Basis of Pathogenesis and Host Adaptation in Rice Blast. *Annu Rev*  
331 *Microbiol* 73(1):601-619 doi:10.1146/annurev-micro-020518-115810
- 332 Gauthier S, Couplier F, Jourden L, Merle M, Beck S, Konrad M, Daignan-Fornier B, Pinson B (2008) Co-  
333 regulation of yeast purine and phosphate pathways in response to adenylic nucleotide variations. *Molecular*  
334 *Microbiology* 68(6):1583-1594 doi:10.1111/j.1365-2958.2008.06261.x
- 335 Jiang SQ, Li H (2018) First Report of Leaf Anthracnose Caused by *Colletotrichum karstii* on Tea-Oil Trees  
336 (*Camellia oleifera*) in China. *Plant Dis* 102(3):674 doi:10.1094/pdis-08-17-1195-pdn
- 337 Li H (2018) Population Genetic Analyses of the Fungal Pathogen *Colletotrichum* on Tea-Oil Trees in China and  
338 Characterization of a MAPK gene *CfPMK1* in the Pathogen. *Central South University of Forestry &*  
339 *Technology*
- 340 Li H, Li Y, Jiang S (2017) Pathogen of Oil-Tea Trees Anthracnose Caused by *Colletotrichum* spp. in Hunan  
341 Province. *Scientia Silvae Sinicae* 53(8):43-53
- 342 Li H, Zhou G-Y, Liu J-A, Xu J (2016) Population Genetic Analyses of the Fungal Pathogen *Colletotrichum*  
343 *fructicola* on Tea-Oil Trees in China. *PLoS ONE* 11(6):e0156841-e0156841  
344 doi:10.1371/journal.pone.0156841
- 345 Lingner U, Münch S, Deising HB, Sauer N (2011) Hexose transporters of a hemibiotrophic plant pathogen:  
346 functional variations and regulatory differences at different stages of infection. *The Journal of biological*  
347 *chemistry* 286(23):20913-20922 doi:10.1074/jbc.M110.213678
- 348 Ma W (2010) The evaluation for forests ecosystem purify the atmosphere function in Shaoyang city. *Journal of*  
349 *Central South University of Forestry & Technology* 30(02):51-54
- 350 Miller SM, Magasanik B (1990) Role of NAD-linked glutamate dehydrogenase in nitrogen metabolism in  
351 *Saccharomyces cerevisiae*. *Journal of bacteriology* 172(9):4927-4935 doi:10.1128/jb.172.9.4927-4935.1990
- 352 Morrow CA, Valkov E, Stamp A, Chow EWL, Lee IR, Wronski A, Williams SJ, Hill JM, Djordjevic JT, Kappler

- 353 U, Kobe B, Fraser JA (2012) De novo GTP biosynthesis is critical for virulence of the fungal pathogen  
354 *Cryptococcus neoformans*. *PLoS pathogens* 8(10):e1002957-e1002957 doi:10.1371/journal.ppat.1002957
- 355 Namiki F, Matsunaga M, Okuda M, Inoue I, Nishi K, Fujita Y, Tsuge T (2001) Mutation of an Arginine  
356 Biosynthesis Gene Causes Reduced Pathogenicity in *Fusarium oxysporum* f. sp. *melonis*. *Molecular Plant-  
357 Microbe Interactions*® 14(4):580-584 doi:10.1094/mpmi.2001.14.4.580
- 358 Pereira MF, De Araújo Dos Santos CM, De Araújo EF, De Queiroz MV, Bazzolli DMS (2013) Beginning to  
359 understand the role of sugar carriers in *Colletotrichum lindemuthianum*: the function of the gene *mfs1*.  
360 *Journal of Microbiology* 51(1):70-81 doi:10.1007/s12275-013-2393-5
- 361 Su F (2018) Study on Germplasm Resources and Antioxidant Activity of Wild Tea Trees in Wuzhishan City.  
362 Hainan University
- 363 Sun M (2019) Characterization of mRNA Splicing Related SNU66 and Purine Nucleotide Metabolism Pathway  
364 Genes in *Fusarium Graminearum*. Northwest A & F University
- 365 Takahara H, Huser A, O'connell R (2012) Two arginine biosynthesis genes are essential for pathogenicity of  
366 *Colletotrichum higginsianum* on *Arabidopsis*. *Mycology* 3(1):54-64
- 367 Tang YL, Zhou GY, Li H (2015) Identification of a New Anthracnose of *Camellia oleifera* Based on Multiple-  
368 gene Phylogeny. *Chinese Journal of Tropical crops* 36(5):972-977
- 369 Wang H, Lin F, Wang Z (2004) Mechanical Penetrating Force of Appressoria of Plant Pathogenic Fungi  
370 *Mycosystema* 23(1):151-157
- 371 Yan QJ, Liu Y, Jiang ZQ (2017) Advances in Microbial  $\alpha$ -Galactosidase. *Journal of Microbiology* 37(03):1-9
- 372 Yang L, Ru Y, Cai X, Yin Z, Liu X, Xiao Y, Zhang H, Zheng X, Wang P, Zhang Z (2019) MoImd4 mediates  
373 crosstalk between MoPdeH-cAMP signalling and purine metabolism to govern growth and pathogenicity in  
374 *Magnaporthe oryzae*. *Molecular plant pathology* 20(4):500-518 doi:10.1111/mpp.12770
- 375 Ye J, He W (2011) Forest pathology. China Forestry Press, Beijing
- 376 Zhang Y, Shi H, Liang S, Ning G, Xu N, Lu J, Liu X, Lin F (2015) MoARG1, MoARG5,6 and MoARG7 involved  
377 in arginine biosynthesis are essential for growth, conidiogenesis, sexual reproduction, and pathogenicity in  
378 *Magnaporthe oryzae*. *Microbiological Research* 180(11-22 doi:10.1016/j.micres.2015.07.002
- 379 Zheng DJ, Pan XZ, Zhang DM (2016) Survey and Analysis on Tea-oil *Camellia* Resource in Hainan. *Journal of*  
380 *Northwest Forestry University* 31(1):130-135
- 381 Zhou W, Wen Q, Yang J, Wang J, Xu L, Xu L (2017) Establishment of DNA fingerprints and cluster analysis for  
382 oil camellia cultivars based on SSR markers. *Fenzi ZhiwuYuzhong (Molecular Plant Breeding)* 15(1):238-

383 249

384 Zhou Y (2015) Mechanisms of interaction between *Pichia membranaceus*-bound chitosan and anthrax-citrus fruits.

385 Chinese Society of Plant Pathology:201-202

386 Zhu H, Wang W, Yan Y (2009) Effect of proline on plant growth under different stress conditions. Journal of

387 Northeast Forestry University 37(4):86-89

388 Zrenner R, Stitt M, Sonnewald U, Boldt R (2006) PYRIMIDINE AND PURINE BIOSYNTHESIS AND

389 DEGRADATION IN PLANTS. Annual Review of Plant Biology 57(1):805-836

390 doi:10.1146/annurev.arplant.57.032905.105421

391

392

393 **Tables**

394 Table 1 Geographical and climatic features of Wuzhishan and Shaoyang

| Items                                          | Hainan Wuzhishan                                                                                                                                           | Hunan Shaoyang                                                                                                                                                   |
|------------------------------------------------|------------------------------------------------------------------------------------------------------------------------------------------------------------|------------------------------------------------------------------------------------------------------------------------------------------------------------------|
| latitude and longitude                         | East longitude 109°19'~109°44'                                                                                                                             | East longitude 109°49'~112°57'                                                                                                                                   |
|                                                | North latitude 18°38'~19°02'                                                                                                                               | North latitude 25°58'~27°40'                                                                                                                                     |
| Climate type                                   | Tropical ocean monsoon climate                                                                                                                             | Subtropical monsoon humid climate                                                                                                                                |
| Average annual temperature                     | 22.4°C                                                                                                                                                     | 15°C ~22°C                                                                                                                                                       |
| The highest temperature in history (1959-2019) | 35.9°C                                                                                                                                                     | 38°C                                                                                                                                                             |
| The lowest temperature in history (1959-2019)  | 11°C                                                                                                                                                       | -22°C                                                                                                                                                            |
| Average annual rainfall                        | 2444mm                                                                                                                                                     | 1368mm                                                                                                                                                           |
| Climate diversity                              | Large temperature difference between day and night; high temperatures throughout the year; Heavy rainfall in summer and extremely short spring and autumn. | Mild climate, distinct four seasons, large seasonal temperature difference; sufficient rainfall, heavy rain in spring and summer; often dry in summer and autumn |

395

396 Table 2 Primer related information for real-time PCR

| Gene ID    | Primer Sequence (5' →3' ) | Tm |
|------------|---------------------------|----|
| CGGC5_1052 | F: GCTCAACCGCTTCCTGTCC    | 60 |
|            | R: GTTGAGGCTCTGCATGTTGG   |    |



|             |                                                    |    |
|-------------|----------------------------------------------------|----|
| MSTRG.12379 | F: ATCCCAGCCAGTGGTCAAAG<br>R: GACCTCAACACCGACTCCAG | 60 |
| CGGC5_14884 | F: GAATCCCCAGGCACCTTTCA<br>R: TTGAGCAGGATGCGAGAGC  | 60 |
| CGGC5_8685  | F: ACCTCAGGGCAACAACAACA<br>R: AGGCTGTGGGAGTAGTAGGG | 60 |
| CGGC5_435   | F: ACTTCCATCGTCTGGCAAGG<br>R: ATAGGGCGCCGATGAAAGAG | 60 |
| Actin       | F: ATGTGCAAGGCCGTTTTCGC<br>R: TACGAGTCCTTCTGGCCCAT | 60 |

397

398

Table 3 GO terms significantly enriched in oil tea leaves inoculated with strains of *C. fructicola* and related up-regulated genes

| GO ID      | Term                                     | All genes with<br>GO annotation | DEGs with GO annotation |    | Pvalue   |          |
|------------|------------------------------------------|---------------------------------|-------------------------|----|----------|----------|
|            |                                          |                                 | WZS                     | SY | WZS      | SY       |
| GO:0030684 | preribosome                              | 88                              | 84                      | 58 | 6.17E-26 | 1.42E-07 |
| GO:0015934 | large ribosomal subunit                  | 38                              | 37                      | 28 | 9.39E-13 | 1.08E-05 |
| GO:0000313 | organellar ribosome                      | 48                              | 44                      | 36 | 2.61E-12 | 2.71E-07 |
| GO:0005198 | structural molecule activity             | 61                              | 49                      | 37 | 1.36E-10 | 8.63E-05 |
| GO:0008135 | translation factor activity, RNA binding | 65                              | 42                      | 23 | 5.36E-05 | 0.6050   |

|            |                                               |    |    |    |          |          |
|------------|-----------------------------------------------|----|----|----|----------|----------|
| GO:0015925 | galactosidase activity                        | 20 | 16 | 15 | 3.25E-04 | 4.76E-04 |
| GO:0009064 | glutamine family amino acid metabolic process | 51 | 32 | 31 | 1.55E-03 | 5.61E-04 |
| GO:0009100 | glycoprotein metabolic process                | 30 | 11 | 18 | 0.7554   | 9.73E-03 |

399

400

Table 4 KEGG pathways significantly enriched in oil tea leaves inoculated with strains of *C. fructicola* and related up-regulated genes

| Pathway ID | Pathway                           | All genes with pathway annotation | DEGs with pathway annotation |    | Qvalue   |          |
|------------|-----------------------------------|-----------------------------------|------------------------------|----|----------|----------|
|            |                                   |                                   | WZS                          | SY | WZS      | SY       |
| ko03010    | Ribosome                          | 102                               | 99                           | 88 | 7.04E-30 | 2.34E-20 |
| ko00330    | Arginine and proline metabolism   | 79                                | 51                           | 50 | 3.45E-03 | 1.07E-03 |
| ko00230    | Purine metabolism                 | 99                                | 62                           | 37 | 3.10E-03 | 0.9999   |
| ko03008    | Ribosome biogenesis in eukaryotes | 71                                | 56                           | 42 | 9.59E-08 | 0.0231   |
| ko03013    | RNA transport                     | 93                                | 63                           | 41 | 9.49E-05 | 0.9079   |
| ko03020    | RNA polymerase                    | 26                                | 22                           | 12 | 5.79E-04 | 0.9727   |
| ko03040    | Spliceosome                       | 88                                | 68                           | 40 | 1.33E-08 | 0.7774   |

401

402

Table 5 12 Up-regulated genes specific to the WZS group related to purine synthesis and catabolism

| Gene ID    | Gene | Description                       | Pathway Module |
|------------|------|-----------------------------------|----------------|
| CGGC5_8860 | APT1 | Adenine phosphoribosyltransferase | --             |
| CGGC5_5780 | NT5E | 5'-nucleotidase                   | --             |

|             |             |                                                   |                                     |
|-------------|-------------|---------------------------------------------------|-------------------------------------|
| CGGC5_5691  | UAZ         | Uricase                                           | Purine degradation                  |
| CGGC5_3653  | PRS5        | Ribose-phosphate pyrophosphokinase                | PRPP biosynthesis                   |
| CGGC5_3645  | ADE6        | Phosphoribosylformylglycinamide synthase          | IMP biosynthesis                    |
| CGGC5_2412  | ADE17       | IMP cyclohydrolase                                | IMP biosynthesis                    |
| CGGC5_15250 | ADA1        | AMP deaminase                                     | --                                  |
| CGGC5_13215 | AAH1        | Adenosine deaminase                               | --                                  |
| CGGC5_11685 | GUA1        | GMP synthase                                      | Guanine ribonucleotide biosynthesis |
| CGGC5_11516 | SPCC830.11c | Adenylate kinase                                  | Adenine ribonucleotide biosynthesis |
| CGGC5_11342 | ADE3        | Phosphoribosylformylglycinamide synthase, partial | IMP biosynthesis                    |
| CGGC5_11063 | NCU09789    | Adenylosuccinate synthetase                       | Adenine ribonucleotide biosynthesis |

---

404 **Figures**

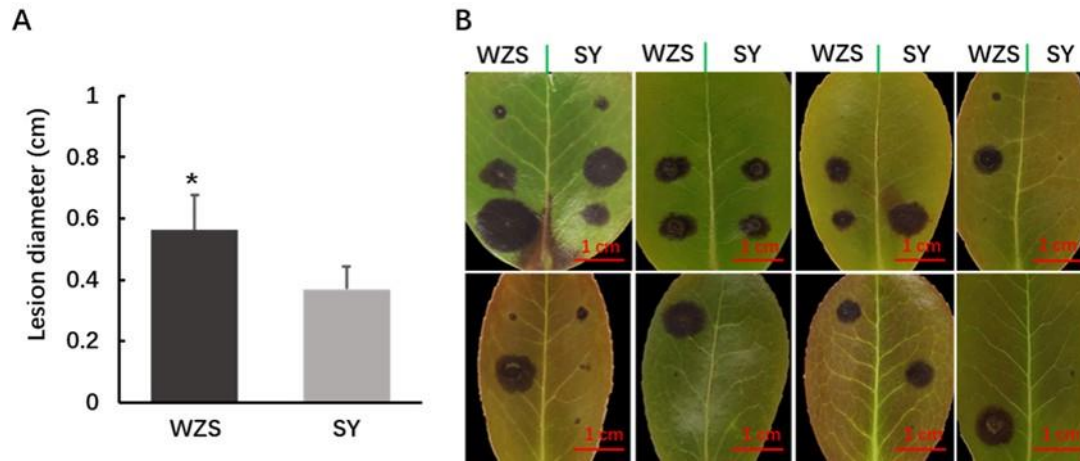

405

406 **Fig. 1** Pathogenicity of *C. fructicola* populations collected from Shaoyang and Wuzhishan to oil-tea leaves. A: Lesion diameters on oil-tea leaves following inoculation with *C.*

407 *fructicola* populations from Wuzhishan and Shaoyang. Error bars are mean  $\pm$  standard deviation and asterisks represent significance at  $*P < 0.05$  ( $P = 0.046$ ). B: Lesions after 96

408 hours of inoculation. Green vertical lines represent leaf veins. Wuzhishan strains and Shaoyang strains were inoculated on the left and right sides of leaves.

409

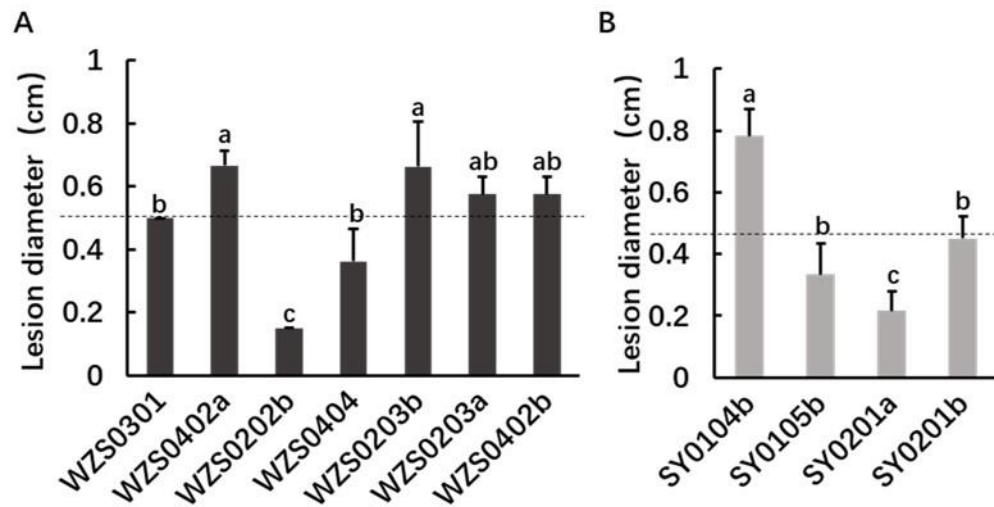

410

411 **Fig. 2** Pathogenicity of *C. fructicola* strains. A: Pathogenicity of 7 *C. fructicola* strains from Wuzhishan. The dotted line is the average lesion diameter. Error bars are mean ±  
 412 standard deviation. B: Pathogenicity of 4 *C. fructicola* strains from Shaoyang. The dotted line is the average lesion diameter. Error bars are mean ± standard deviation.

413

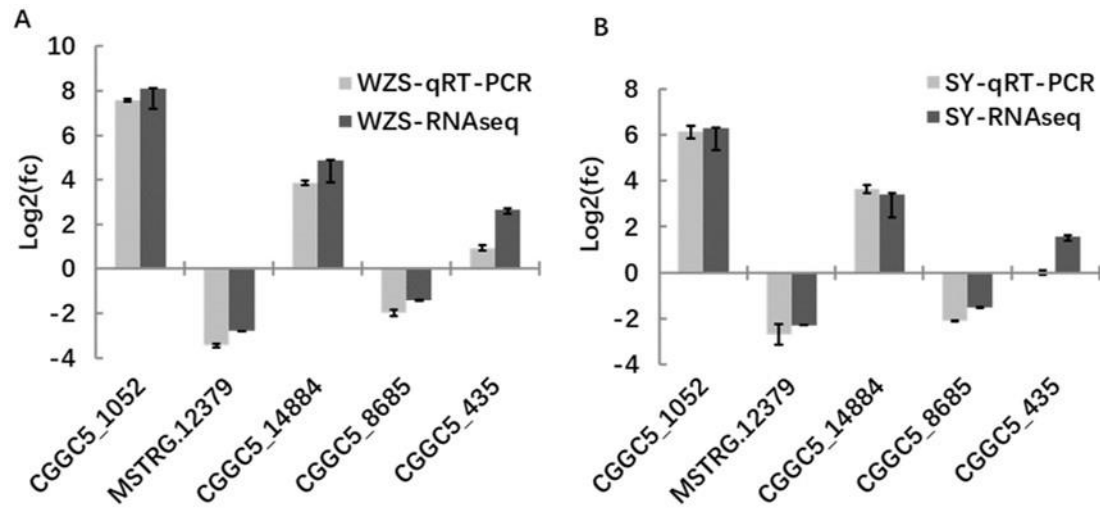

414

415 **Fig. 3** Gene expression of qRT-PCR and RNAseq. A: qRT-PCR and RNAseq verification of WZS-S-vs-WZS-L. B: qRT-PCR and RNAseq verification result of SY-S-vs-SY-

416 L.

417

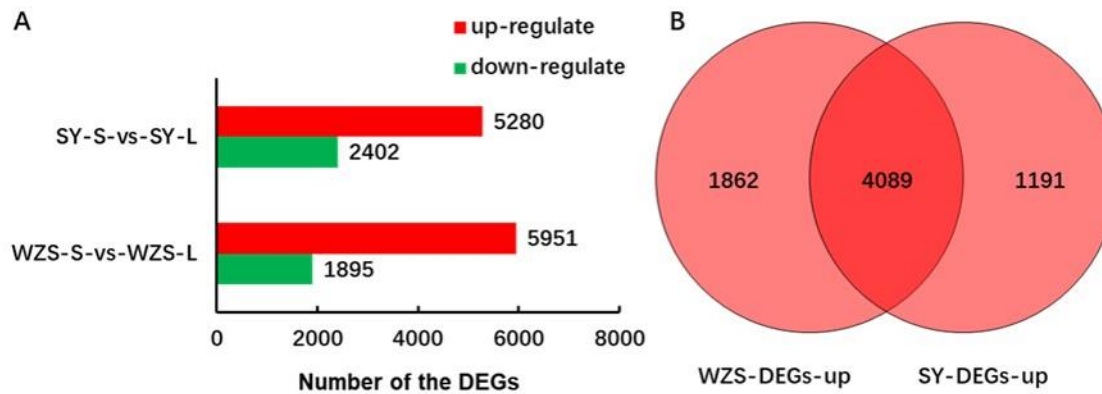

418

419 **Fig. 4** Overview of differentially expressed genes. A: Comparison of differential genes before and after infection. B: Venn diagram of number of up-regulated genes after

420 infection.

421

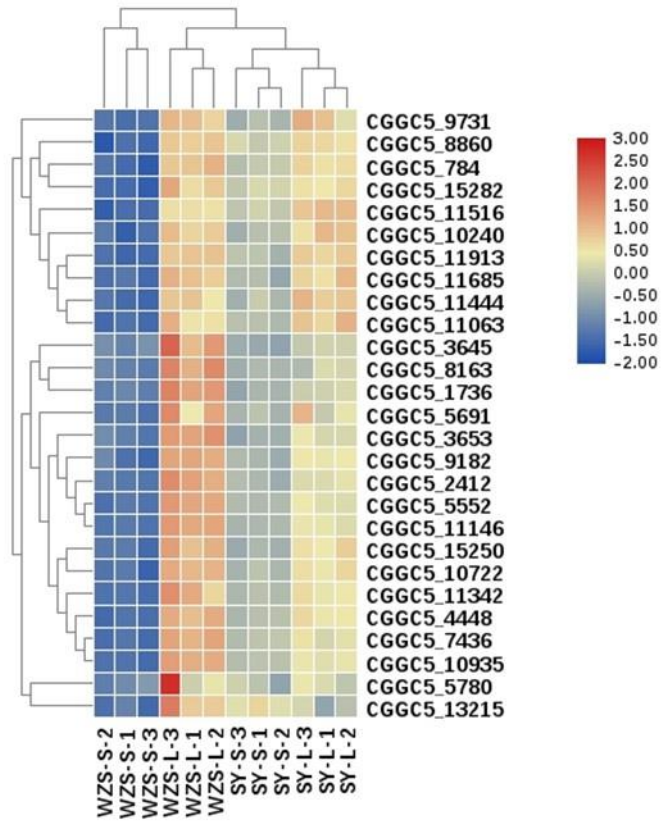

422

423 **Fig. 5** Heatmap of the 27 up-regulated genes specific to the WZS group. The heatmap was created using the TBtool (version 0.66837, (Chen et al. 2018)) function “heatmap”

424 with default parameter setting and shows normalized FPKM values.

425

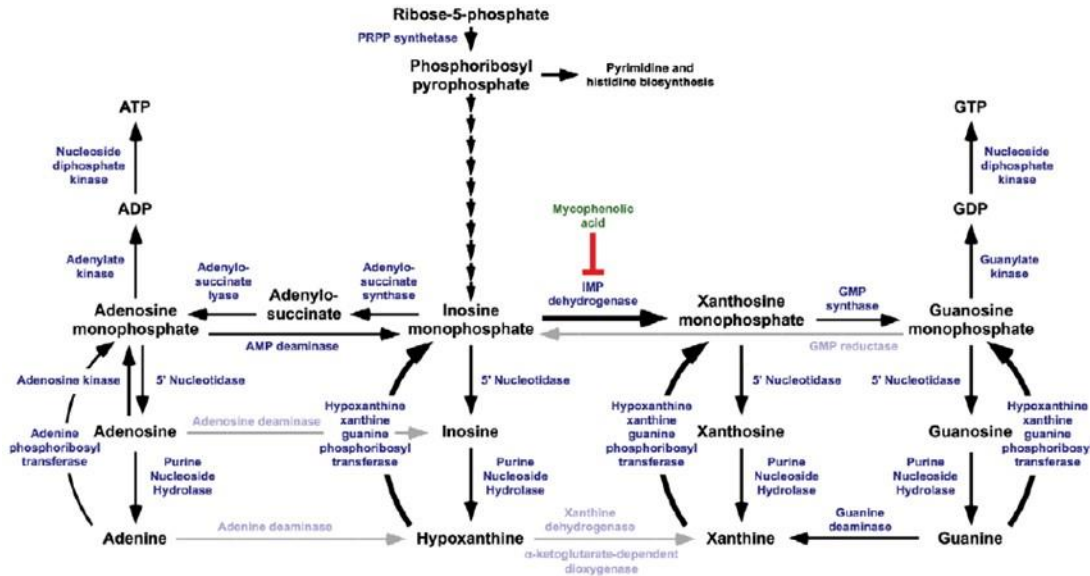

426

427 **Fig. 6** Components of the purine metabolic pathway (Morrow et al. 2012). The de novo synthesis pathway uses 5-phosphate ribose (Ribose-5P) as the raw material, and  
 428 generates phosphoribosyl pyrophosphate (PRPP) via phosphoribosyl pyrophosphate kinase (PRS), which then synthesizes inosinic acid (IMP) through ten consecutive reactions  
 429 catalyzed by various enzymes. In the de novo synthesis pathway, IMP is converted into adenylyate (AMP), or to xanthosine (XMP) and then guanylate (GMP), and finally to  
 430 ATP and GTP. In the rescue pathway, free adenine and guanine in cells synthesize AMP and GMP under the action of adenine phosphoribosyltransferase (APT). The purine  
 431 degradation pathway first converts purine nucleotides, such as AMP and GMP, into xanthine by various enzymes. Xanthine is finally degraded to produce uric acid.

432



**A**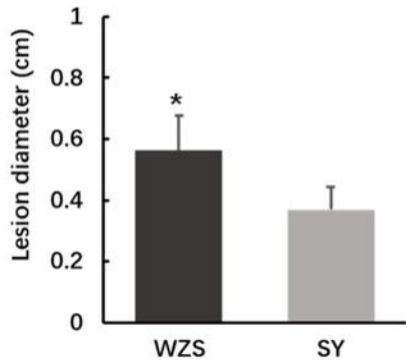**B**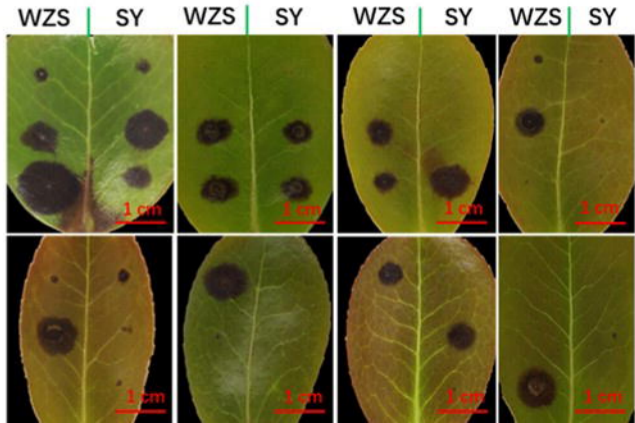

A

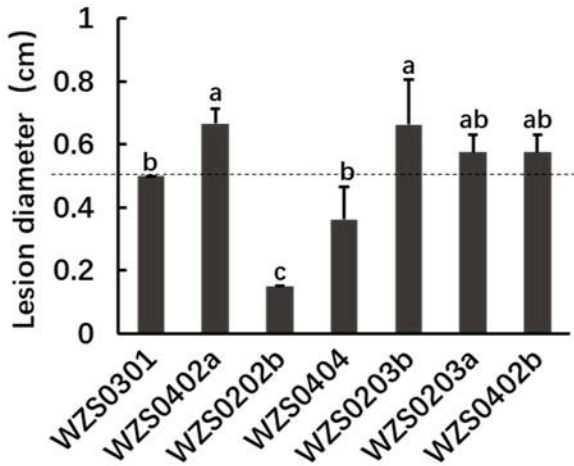

B

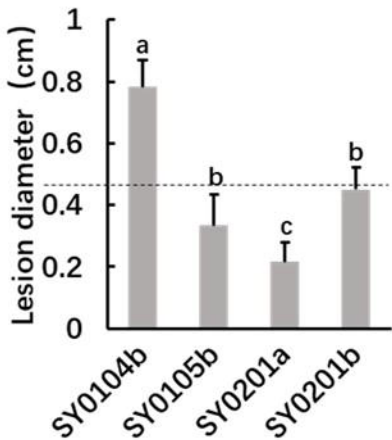

A

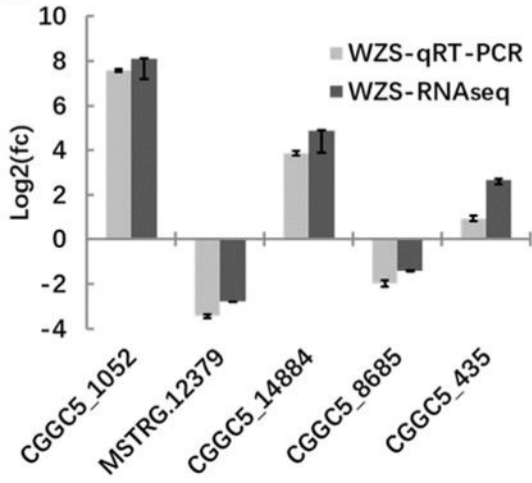

B

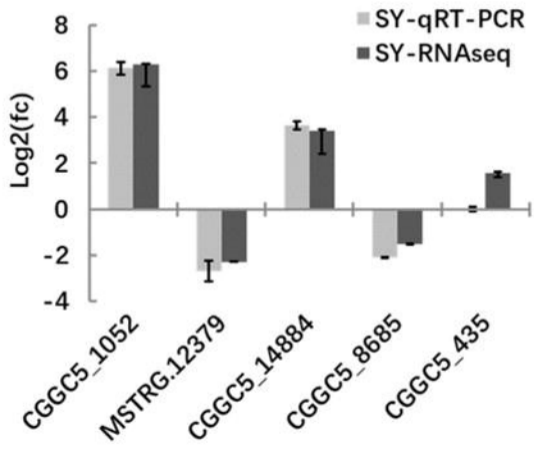

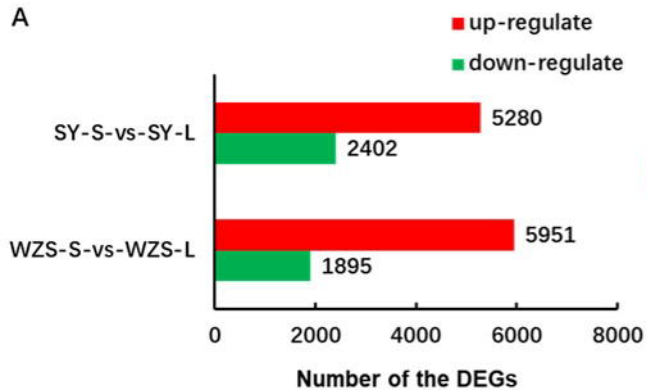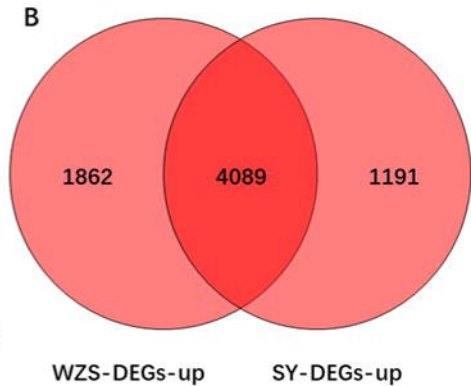

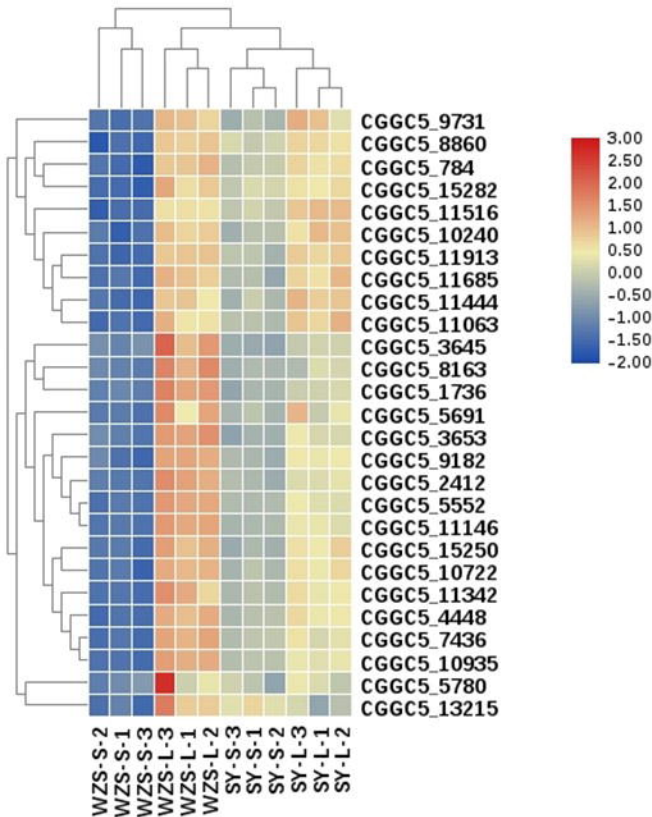

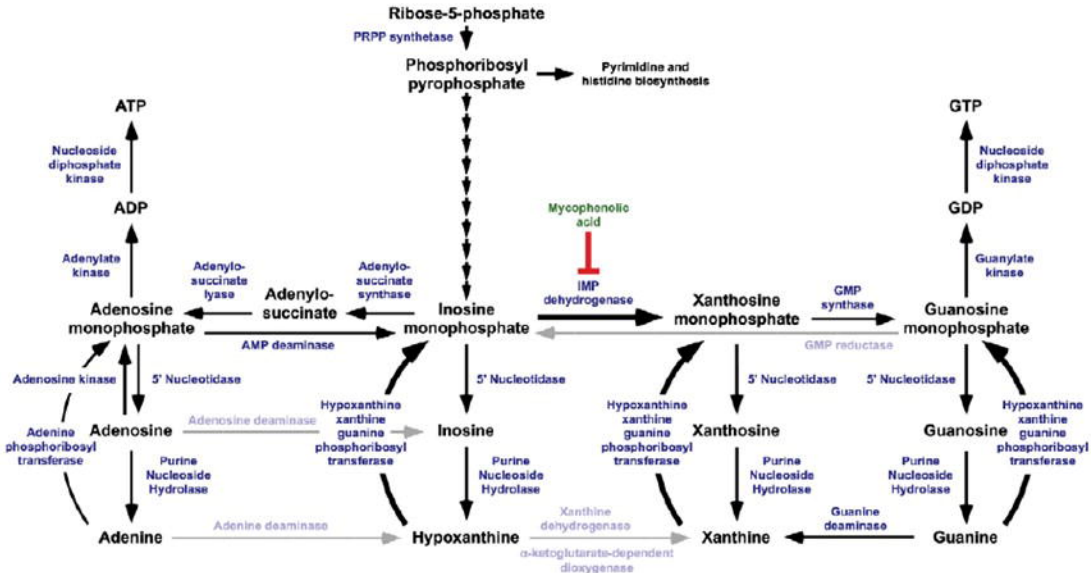

Source: https://www.biorxiv.org/content/biorxiv/early/2020/08/03/2020.07.13.198457.full.pdf
